1 **A chemogenetic platform for controlling plasma membrane signaling**  
2 **and synthetic signal oscillation**

3

4 Yuka Hatano,<sup>1,#</sup> Sachio Suzuki,<sup>2,#</sup> Akinobu Nakamura,<sup>3,#</sup> Tatsuyuki Yoshii,<sup>1,4,#</sup> Kyoko  
5 Atsuta-Tsunoda,<sup>1</sup> Kazuhiro Aoki,<sup>3,5,6</sup> & Shinya Tsukiji<sup>1,2\*</sup>

6

7 <sup>1</sup>*Department of Life Science and Applied Chemistry, Nagoya Institute of Technology, Gokiso-cho,*  
8 *Showa-ku, Nagoya 466-8555, Japan*

9 <sup>2</sup>*Department of Nanopharmaceutical Sciences, Nagoya Institute of Technology, Gokiso-cho, Showa-*  
10 *ku, Nagoya 466-8555, Japan*

11 <sup>3</sup>*Quantitative Biology Research Group, Exploratory Research Center on Life and Living Systems*  
12 *(ExCELLS), National Institutes of Natural Sciences, 5-1 Higashiyama, Myodaiji-cho, Okazaki, Aichi*  
13 *444-8787, Japan*

14 <sup>4</sup>*PRESTO, Japan Science and Technology Agency (JST), 4-1-8 Honcho, Kawaguchi, Saitama 332-*  
15 *0012, Japan*

16 <sup>5</sup>*Division of Quantitative Biology, National Institute for Basic Biology, National Institutes of Natural*  
17 *Sciences, 5-1 Higashiyama, Myodaiji-cho, Okazaki, Aichi 444-8787, Japan*

18 <sup>6</sup>*Department of Basic Biology, Faculty of Life Science, SOKENDAI (The Graduate University for*  
19 *Advanced Studies), 5-1 Higashiyama, Myodaiji-cho, Okazaki, Aichi 444-8787, Japan*

20

21 <sup>#</sup>*These authors contributed equally to this work.*

22

23 ORCID

24 Tatsuyuki Yoshii: 0000-0002-3465-4219

25 Kazuhiro Aoki: 0000-0001-7263-1555

26 Shinya Tsukiji: 0000-0002-1402-5773

27

28 \*Correspondence should be addressed to S.T. (email: [stsukiji@nitech.ac.jp](mailto:stsukiji@nitech.ac.jp))

29

30

1 **ABSTRACT**

2 **Chemogenetic methods that enable the rapid translocation of specific signaling**  
3 **proteins in living cells using small molecules are powerful tools for manipulating and**  
4 **interrogating intracellular signaling networks. However, existing techniques rely on**  
5 **chemically induced dimerization of two protein components and have certain**  
6 **limitations, such as a lack of reversibility, bioorthogonality, and usability. Here, by**  
7 **expanding our self-localizing ligand-induced protein translocation (SLIPT)**  
8 **approach, we have developed a versatile chemogenetic system for plasma membrane**  
9 **(PM)-targeted protein translocation. In this system, a novel engineered *Escherichia***  
10 ***coli* dihydrofolate reductase in which a hexalysine (K6) sequence is inserted in a loop**  
11 **region (<sup>K6</sup>DHFR) is used as a universal protein tag for PM-targeted SLIPT. Proteins**  
12 **of interest that are fused to the <sup>K6</sup>DHFR tag can be specifically recruited from the**  
13 **cytoplasm to the PM within minutes by addition of a myristoyl-D-Cys-tethered**  
14 **trimethoprim ligand (m<sup>D</sup>cTMP). We demonstrated the broad applicability and**  
15 **robustness of this engineered protein–synthetic ligand pair as a tool for the**  
16 **conditional activation of various types of signaling molecules, including protein and**  
17 **lipid kinases, small GTPases, heterotrimeric G proteins, and second messengers. In**  
18 **combination with a competitor ligand and a culture-medium flow chamber, we**  
19 **further demonstrated the application of the system for chemically manipulating**  
20 **protein localization in a reversible and repeatable manner to generate synthetic**  
21 **signal oscillations in living cells. The present bioorthogonal <sup>K6</sup>DHFR/m<sup>D</sup>cTMP-**  
22 **based SLIPT system affords rapid, reversible, and repeatable control of the PM**  
23 **recruitment of target proteins, offering a versatile and easy-to-use chemogenetic**  
24 **platform for chemical and synthetic biology applications.**

25

26

27 **INTRODUCTION**

28 Cellular functions are regulated by signaling networks involving proteins, lipids, and  
29 other second messenger molecules, and cells precisely coordinate biochemical signaling  
30 events in space and time in a fast and reversible manner.<sup>[1,2]</sup> Recently, single-cell imaging  
31 experiments have also revealed that several signaling proteins, such as the extracellular  
32 signal-regulated kinase (ERK), show oscillatory activation dynamics and the frequency  
33 of the activation pulse determines the cellular responses.<sup>[3,4]</sup> The ability to manipulate the

1 activity of signaling molecules and pathways in a rapid, reversible, and repeatable manner  
2 would therefore be useful for understanding the relationships between signaling input  
3 dynamics and cellular outputs, and ultimately for engineering synthetic cellular behaviors.

4 Methods that enable the rapid localization control or translocation of specific proteins  
5 in living cells offer a powerful means for modulating signaling activities. Consequently,  
6 several chemogenetic<sup>[5-7]</sup> and optogenetic<sup>[8,9]</sup> approaches have been developed as tools for  
7 controlling protein translocation. Chemogenetic protein translocation systems are  
8 particularly attractive because small-molecule control is easy to perform *in vitro*, *ex vivo*,  
9 and *in vivo* to confer rapid temporal modulation. In addition, unlike most optogenetic  
10 approaches, chemogenetic methods can be used together with fluorescent reporters of  
11 various colors, enabling experiments that combine user-defined perturbation with  
12 simultaneous visualization of the subcellular dynamics of multiple signaling activities in  
13 the same living cell (“experimental multiplexing”).<sup>[10]</sup>

14 The most widely used method for chemogenetic protein translocation control relies  
15 on a chemically induced dimerization (CID) system using the small-molecule rapamycin,  
16 which induces the heterodimerization of the FK506-binding protein (FKBP) and the  
17 FKBP-rapamycin-binding (FRB) domain.<sup>[11-13]</sup> The rapamycin CID system has been  
18 proven to be a versatile tool to control the translocation of a wide range of signaling  
19 proteins with fast kinetics. However, the rapamycin CID is essentially irreversible.<sup>[14]</sup>  
20 Rapamycin also binds and interferes with the functions of endogenous FKBP and the  
21 mammalian target of rapamycin (mTOR), leading to undesired biological effects. To  
22 address these issues, several new CID systems have been rationally constructed using two  
23 ligand-binding protein tags, including those based on *Escherichia coli* dihydrofolate  
24 reductase (eDHFR) and the FKBP F36V mutant,<sup>[15,16]</sup> SNAP-tag and (wild-type)  
25 FKBP,<sup>[17]</sup> and eDHFR and HaloTag<sup>[16,18-20]</sup> pairs. In these systems, chimeric molecules  
26 consisting of two small-molecule ligands for each protein tag are used as chemical  
27 dimerizers. These systems allow reversible protein translocation by the combined use of  
28 the chemical dimerizer and a free competitor ligand. However, the protein tag-based CID  
29 systems require the careful adjustment of the chemical dimerizer concentrations because  
30 excess chemical dimerizer will bind to both the protein components, competitively  
31 interfering with the protein heterodimerization. In addition, the chemical dimerizer for  
32 the SNAP-tag/FKBP CID system lacks biorthogonality because it also binds to  
33 endogenous FKBP.<sup>[17]</sup> Moreover, as a common limitation shared by all CID tools,

1 dimerization-dependent methods require the coexpression of two proteins with  
2 appropriate expression levels and stoichiometry to control the target protein, which is  
3 challenging in practice. Therefore, the establishment of chemogenetic protein  
4 translocation methods that overcome these limitations is highly desirable.

5 Here we present a versatile, single protein component, chemogenetic protein  
6 translocation system that can be used for manipulating diverse signaling processes at the  
7 plasma membrane (PM) based on our self-localizing ligand-induced protein translocation  
8 (SLIPT) strategy.<sup>[21–24]</sup> In this system, a novel engineered eDHFR in which a hexalysine  
9 (K6) sequence is inserted in a loop region is used as a universal protein tag for PM-  
10 targeted SLIPT. Proteins of interest that are fused to the loop-engineered eDHFR can be  
11 rapidly and specifically recruited to the PM upon addition of myristoyl-D-Cys-tethered  
12 trimethoprim (m<sup>D</sup>cTMP), a previously developed self-localizing ligand (SL). We show  
13 the broad applicability and robustness of this bioorthogonal, loop-engineered  
14 eDHFR/m<sup>D</sup>cTMP-based SLIPT system for the conditional activation of various types of  
15 signaling molecules, including protein and lipid kinases, small GTPases, heterotrimeric  
16 G proteins, and second messengers, such as Ca<sup>2+</sup> and cAMP. We further demonstrated  
17 that the combined use of the present tool and a culture-medium flow system can enable  
18 the chemical control of protein localization in a reversible and repeatable manner to  
19 produce synthetic signal oscillations in living cells, expanding the repertoire of  
20 chemogenetic tools for manipulating intracellular signaling dynamics.

## 23 RESULTS AND DISCUSSION

### 24 Development of a loop-engineered eDHFR tag

25 The inner leaflet of the PM serves as a platform for intracellular signaling networks, and  
26 almost all signaling pathways that determine cell physiology, such as growth,  
27 differentiation, phagocytosis, and migration, are initiated and modulated at the PM.  
28 Therefore, chemogenetic methods capable of recruiting signaling proteins to the PM are  
29 particularly important. Using a bioorthogonal small-molecule trimethoprim (TMP) and  
30 eDHFR pair,<sup>[25]</sup> we have previously developed a PM-targeted SLIPT system (**Figure**  
31 **S1a**).<sup>[22,23]</sup> In this system, a TMP ligand is conjugated via a flexible linker to a designer  
32 myristoyl-D-Cys (myr<sup>D</sup>C) lipopeptide motif to form m<sup>D</sup>cTMP, which is used as an SL  
33 (**Figure 1a**).<sup>[23]</sup> The myr<sup>D</sup>C motif undergoes *S*-palmitoylation of the Cys residue by

1 palmitoyl acyltransferases in cells, which localizes the motif to the PM and the Golgi. In  
2 conjunction, an eDHFR variant containing a hexalysine (K6) sequence at the *N*-terminus  
3 (K6-eDHFR) is used as a protein tag for fusion to proteins of interest.<sup>[22]</sup> Non-engineered  
4 (wild-type) eDHFR is recruited, not only to the PM, but also undesirably to the Golgi by  
5 m<sup>D</sup>cTMP (**Figure S1b** and **Figure S2a**). However, K6-eDHFR is translocated  
6 preferentially to the PM by m<sup>D</sup>cTMP because the PM localization of the m<sup>D</sup>cTMP/K6-  
7 eDHFR complex is enhanced by electrostatic interactions between the cationic K6 tag  
8 and the negatively charged phospholipid phosphatidylserine (PS) present at the inner  
9 PM.<sup>[22]</sup> Consequently, by fusing a protein of interest to the *C*-terminus of the K6-eDHFR  
10 tag, the resulting protein can be recruited specifically to the PM upon addition of  
11 m<sup>D</sup>cTMP (**Figure S1c** and **Figure S2b**). This m<sup>D</sup>cTMP/K6-eDHFR-based SLIPT system  
12 has been used as a tool for conditional PM-specific protein translocation in live cultured  
13 cells and a nematode (*Caenorhabditis elegans*).<sup>[22,23]</sup> However, when the K6-eDHFR tag  
14 was fused to the *C*-terminus of a protein, such as enhanced green fluorescent protein  
15 (EGFP) (EGFP-K6-eDHFR), the protein was translocated to the Golgi in addition to the  
16 PM (**Figure S1d** and **Figure S2c**), implying that the PM specificity of K6-eDHFR was  
17 insufficient. This result indicated that K6-eDHFR can be used as a PM-specific tag only  
18 when it is fused to the *N*-terminus of protein targets, limiting the application of the system.

19 In this work, we aimed to engineer a universal SLIPT tag that can be fused to either  
20 the *N*-terminus or *C*-terminus of proteins or even between two proteins or protein domains,  
21 while retaining the PM-targeting specificity. To this end, we reconsidered the molecular  
22 orientation of the m<sup>D</sup>cTMP/eDHFR complex when it is anchored to the inner surface of  
23 the PM. As shown in **Figure 1b**, in the crystal structure of eDHFR (PDB: 1RG7<sup>[26]</sup>), the  
24 *N*- and *C*-termini of eDHFR are located at the opposite sides of the ligand-binding pocket.  
25 In the previous K6-eDHFR tag, the K6 motif was linked to the *N*-terminus of eDHFR via  
26 a 16 amino acid linker such that the K6 sequence could access the PM.<sup>[22]</sup> Therefore, it is  
27 reasonable to consider that when a protein is fused to the *N*-terminus of K6-eDHFR, the  
28 access of the K6 tag to the PM will be sterically hindered. This may explain the impaired  
29 PM-specificity of the EGFP-K6-eDHFR translocation observed previously. To address  
30 this issue, we sought to introduce the K6 sequence to a different site of the eDHFR. On  
31 the basis of the model shown in **Figure 1b**, we focused on two loop regions, Ser63–Val72  
32 and Ser135–Ser150. These loops are positioned near the ligand-binding pocket and  
33 closely face the inner surface of the PM when the m<sup>D</sup>cTMP/eDHFR complex is in the

1 PM-anchored orientation. We therefore decided to insert the K6 motif into the loop  
2 regions of eDHFR, and constructed two variants, eDHFR<sup>69K6</sup> and eDHFR<sup>145K6</sup>, which  
3 contained the K6 motif between Asp69 and Asp70, and Ala145 and Gln146, respectively  
4 (**Figure 1b**).

5 Prior to performing SLIPT assays in cells, we measured the binding affinity of the  
6 eDHFR variants to TMP *in vitro*. The dissociation constants ( $K_d$ ) of wild-type eDHFR,  
7 K6-eDHFR, eDHFR<sup>69K6</sup>, and eDHFR<sup>145K6</sup> to fluorescein-conjugated TMP (TMP-FL)  
8 were determined by fluorescence polarization measurements to be 18, 24, 106, and 108  
9 nM, respectively (**Figure S3**). Although the binding affinity to TMP was decreased  
10 approximately 6-fold by the insertion of the K6 motif into the loop regions, the loop-  
11 engineered eDHFR<sup>69K6</sup> and eDHFR<sup>145K6</sup> still maintained sub-micromolar affinity to TMP.

12 We tested the ability of the loop-engineered eDHFR variants to act as protein tags for  
13 SLIPT. We first fused eDHFR<sup>69K6</sup> to the *N*-terminus of EGFP (eDHFR<sup>69K6</sup>-EGFP) and  
14 expressed the construct in human epithelial HeLa cells. Before ligand treatment,  
15 eDHFR<sup>69K6</sup>-EGFP was distributed over the entire cell. The addition of m<sup>D</sup>cTMP induced  
16 PM-specific translocation of eDHFR<sup>69K6</sup>-EGFP with almost no observable Golgi  
17 localization (**Figure 1c** and **Figure S2d**). Furthermore, when we fused eDHFR<sup>69K6</sup> to the  
18 *C*-terminus of EGFP (EGFP-eDHFR<sup>69K6</sup>), this protein was also recruited specifically to  
19 the PM in response to m<sup>D</sup>cTMP (**Figure 1d**, **Figure S2e**, and **Movie S1**). Similarly, the  
20 fusion of eDHFR<sup>145K6</sup> to the *N*- or *C*-terminus of EGFP achieved PM-specific  
21 translocation by m<sup>D</sup>cTMP (**Figure 1e,f** and **Figure S2f,g**). These results demonstrated  
22 that both loop-engineered eDHFR<sup>69K6</sup> and eDHFR<sup>145K6</sup> functioned as PM-specific SLIPT  
23 tags that can be fused to either the *N*- or *C*-termini of proteins. The times required for  
24 half-maximal PM recruitment ( $t_{1/2}$ ) of eDHFR<sup>69K6</sup>-EGFP and EGFP-eDHFR<sup>69K6</sup> (at 10  
25  $\mu$ M m<sup>D</sup>cTMP) were 1.4 and 1.5 min, respectively, which were almost comparable with  
26 that of K6-DHFR-EGFP ( $t_{1/2} = 1.7$  min) (**Figure 1g**). In contrast, the m<sup>D</sup>cTMP-induced  
27 PM recruitment times for eDHFR<sup>145K6</sup>-EGFP and EGFP-eDHFR<sup>145K6</sup> ( $t_{1/2} = 2.5$  and 3.2  
28 min, respectively) were slightly slower compared with the eDHFR<sup>69K6</sup> counterparts. On  
29 the basis of these results, we selected eDHFR<sup>69K6</sup> as a universal protein tag for m<sup>D</sup>cTMP-  
30 induced PM-specific protein translocation, which is hereafter denoted as <sup>iK6</sup>DHFR  
31 (internally K6-tagged eDHFR). The <sup>iK6</sup>DHFR tag also induced PM-specific recruitment  
32 of the EGFP fusion protein in NIH3T3 and Cos-7 cells (**Figure S4**), demonstrating the  
33 general applicability of the m<sup>D</sup>cTMP/<sup>iK6</sup>DHFR SLIPT system to various cell lines.

1

## 2 **Mechanistic characterization of the m<sup>D</sup>cTMP/eDHFR<sup>iK6</sup> SLIPT system**

3 Next, we investigated which membrane lipids contributed to the PM-targeting specificity  
4 of the <sup>iK6</sup>DHFR tag. The inner PM is highly anionic compared with other organelle  
5 membranes because of the presence of the negatively charged phospholipids, such as  
6 PS,<sup>[27,28]</sup> and phosphatidylinositol 4-phosphate (PI4P) and phosphatidylinositol-4,5-  
7 bisphosphate [PI(4,5)P<sub>2</sub>]<sup>[28–30]</sup>. On the basis of our previous work,<sup>[22]</sup> we performed  
8 depletion experiments of these anionic lipid species. After recruitment of EGFP-<sup>iK6</sup>DHFR  
9 to the PM by m<sup>D</sup>cTMP, we reduced the PS concentration in the inner PM by the addition  
10 of ionomycin.<sup>[27,28]</sup> As a result, EGFP-<sup>iK6</sup>DHFR dissociated from the PM and was  
11 relocated to the endomembrane (**Figure S5a,b**). In contrast, when we depleted PM  
12 PI4P and PI(4,5)P<sub>2</sub> by the PM recruitment of Pseudojanin, a chimeric protein of Sac1  
13 (PI4P phosphatase) and INPP5E [PI(4,5)P<sub>2</sub> phosphatase], using a rapamycin CID tool,<sup>[29]</sup>  
14 no noticeable dissociation of the PM-localized EGFP-<sup>iK6</sup>DHFR was observed (**Figure**  
15 **S5c–e**). These results suggested that the interaction of the K6 motif in <sup>iK6</sup>DHFR with the  
16 PM PS plays a dominant role in controlling the PM-specific localization of the  
17 m<sup>D</sup>cTMP/<sup>iK6</sup>DHFR system.

18 In nature, many PM-localized proteins, such as MARCS and KRas4B, possess a single  
19 lipid modification (myristoylation or prenylation) and a polybasic domain for PM  
20 targeting.<sup>[27–30]</sup> This fact raises the possibility that the m<sup>D</sup>cTMP/<sup>iK6</sup>DHFR complex, which  
21 contains a myristoyl lipid anchor and the K6 motif, might be able to localize to the PM  
22 without the *S*-palmitoylation of m<sup>D</sup>cTMP. We thus evaluated whether the *S*-  
23 palmitoylation of the D-Cys moiety of m<sup>D</sup>cTMP was required for the m<sup>D</sup>cTMP-induced  
24 PM localization of <sup>iK6</sup>DHFR. When cells expressing EGFP-<sup>iK6</sup>DHFR were treated with  
25 myrTMP lacking the palmitoylatable Cys moiety,<sup>[31]</sup> EGFP-<sup>iK6</sup>DHFR was still recruited  
26 to the PM but was also localized undesirably to the endomembrane region (**Figure S6a,b**).  
27 This result indicated that the D-Cys moiety of m<sup>D</sup>cTMP is not necessarily essential for  
28 PM localization but is critical for achieving the efficient and PM-specific translocation of  
29 <sup>iK6</sup>DHFR-fusion proteins.

30

## 31 **Chemogenetic activation of the Raf/ERK signaling pathway**

32 We applied the m<sup>D</sup>cTMP/<sup>iK6</sup>DHFR SLIPT system to manipulate intracellular signaling.  
33 We first focused on cRaf, which is a protein kinase that regulates diverse cell functions,

1 including growth, survival, and differentiation.<sup>[32]</sup> When cRaf is recruited to the PM, it is  
2 activated by autophosphorylation, which triggers the activation of downstream MEK and  
3 ERK. To construct a synthetic cRaf protein, the localization of which could be controlled  
4 by m<sup>D</sup>cTMP, full-length cRaf was fused to the C-terminus of EGFP-<sup>iK6</sup>DHFR to generate  
5 EGFP-<sup>iK6</sup>DHFR-cRaf (**Figure 2a**). We then expressed this protein in HeLa cells. To  
6 monitor the activity of endogenous ERK, we coexpressed a kinase translocation reporter  
7 (KTR) for ERK, which was fused to monomeric Kusabira Orange (mKO) (ERK-KTR-  
8 mKO).<sup>[22]</sup> In the KTR system, the endogenous ERK activity can be quantified by the ratio  
9 of the cytoplasmic to the nuclear fluorescence intensity (C/N ratio) of the reporter  
10 protein.<sup>[33,34]</sup> Prior to the addition of m<sup>D</sup>cTMP, EGFP-<sup>iK6</sup>DHFR-cRaf showed a  
11 cytoplasmic distribution (**Figure 2b**). When cells were treated with m<sup>D</sup>cTMP, EGFP-  
12 <sup>iK6</sup>DHFR-cRaf translocated to the PM within minutes ( $t_{1/2} = 1.2$  min) (**Figure 2c** and  
13 **Movie S2**). Concomitant with this cRaf translocation, an increase in the C/N ratio  
14 (indicative of nuclear export of ERK-KTR-mKO) was observed, demonstrating efficient  
15 activation of endogenous ERK (**Figure 2b**). The C/N ratio increase reached a plateau  
16 approximately 20 min after m<sup>D</sup>cTMP addition (**Figure 2c**). Such ERK activation was not  
17 observed when we performed the same experiment in the presence of PD184352, a MEK  
18 inhibitor (**Figure S7a**), or using EGFP-<sup>iK6</sup>DHFR lacking the cRaf protein (**Figure S7b**).  
19 These results demonstrated that the m<sup>D</sup>cTMP/<sup>iK6</sup>DHFR SLIPT system can be used for  
20 synthetic activation of the Raf/ERK signaling pathway. Furthermore, the above  
21 experiment showed that the loop-engineered <sup>iK6</sup>DHFR functions as a PM-specific SLIPT  
22 tag even when it is inserted between two protein domains (in this case, EGFP and cRaf).

23

## 24 **Chemogenetic control of heterotrimeric G proteins and second messenger signaling**

25 Heterotrimeric G proteins are an important class of signaling molecules regulated  
26 downstream of G protein-coupled receptors (GPCRs). In particular, there are several G $\alpha$   
27 isoforms, including G $\alpha_q$ , G $\alpha_s$ , G $\alpha_{12/13}$ , and G $\alpha_i$ , and more than one of these isoforms are  
28 often activated simultaneously upon GPCR stimulation.<sup>[35,36]</sup> Thus, it has been difficult to  
29 study the contribution of each isoform to cellular functions. In a pioneering work,  
30 Putyrski and Schultz have developed conditional G $\alpha$  activation systems using the  
31 rapamycin CID technique.<sup>[37]</sup> However, chemogenetic methods applicable to control  
32 heterotrimeric G proteins are still limited. We therefore tested the utility of the present  
33 SLIPT system for manipulating G protein signaling. First, we targeted G $\alpha_q$ . The G $\alpha_q$



1 protein is an activator of phospholipase C $\beta$  (PLC $\beta$ ), and activation of G $\alpha$ q triggers Ca<sup>2+</sup>  
2 release from the endoplasmic reticulum (ER) to the cytoplasm, and subsequent Ca<sup>2+</sup>  
3 oscillations.<sup>[38,39]</sup> To control G $\alpha$ q localization and activity using m<sup>D</sup>cTMP, a  
4 palmitoylation-deficient constitutively active form of G $\alpha$ q was fused at the C-terminus to  
5 mNeonGreen-tagged <sup>iK6</sup>DHFR (mNG-<sup>iK6</sup>DHFR-G $\alpha$ q) and expressed in HeLa cells  
6 (**Figure 3a**). To evaluate the intracellular Ca<sup>2+</sup> concentration, we coexpressed mNG-  
7 <sup>iK6</sup>DHFR-G $\alpha$ q and R-GECO, a genetically encoded red fluorescent Ca<sup>2+</sup> indicator.<sup>[40]</sup>  
8 When cells coexpressing mNG-<sup>iK6</sup>DHFR-G $\alpha$ q and R-GECO were treated with m<sup>D</sup>cTMP,  
9 mNG-<sup>iK6</sup>DHFR-G $\alpha$ q was rapidly translocated to the PM, which induced a series of Ca<sup>2+</sup>  
10 spikes in the cells (**Figure 3b,c** and **Movie S3**). In contrast, PM recruitment of a PLC $\beta$ -  
11 binding-deficient G $\alpha$ q mutant did not induce Ca<sup>2+</sup> oscillations (**Figure S8**). Therefore, the  
12 applicability of the m<sup>D</sup>cTMP/<sup>iK6</sup>DHFR SLIPT system to control G $\alpha$ q protein and Ca<sup>2+</sup>  
13 signaling was demonstrated.

14 Furthermore, it was also possible to apply the system to control various signaling  
15 proteins that are naturally regulated by receptor tyrosine kinases and GPCRs, including  
16 G $\alpha$ s (cAMP production) (**Figure S9** and **Movie S4**), RasGEF (Ras activation) (**Figure**  
17 **S10** and **Movie S5**), PI3K (phosphatidylinositol 3,4,5-trisphosphate [PI(3,4,5)P<sub>3</sub>]  
18 production) (**Figure S11** and **Movie S6**), and Tiam1 (Rac activation and lamellipodium  
19 induction) (**Figure S12** and **Movie S7**), verifying the broad applicability and robustness  
20 of the system as a chemogenetic platform for manipulating intracellular signaling  
21 processes at the PM.

22

### 23 **Chemical induction of synthetic signal oscillations**

24 Reversibility is an important characteristic of cell signaling events. Recent single-cell  
25 analyses have revealed that several signaling proteins, including p53, ERK, and NF- $\kappa$ B,  
26 exhibited oscillatory dynamics to govern cell fate decisions.<sup>[3,4,41–43]</sup> Therefore, the ability  
27 to artificially induce oscillatory dynamics of cell signaling in living cells would be highly  
28 valuable for understanding the mechanisms of the dynamical encoding by these signaling  
29 molecules. This ability requires methods that allow protein activity pulses to be  
30 manipulated in a reversible and repeatable manner. To date, such oscillatory control of  
31 protein activity has been achieved only by optogenetics,<sup>[41,44–46]</sup> and chemogenetic  
32 approaches for this purpose have not yet been well established. Hence, we attempted to  
33 apply our m<sup>D</sup>cTMP/<sup>iK6</sup>DHFR SLIPT system to the oscillatory (multi-cycle) control of

1 protein activity in living cells.

2 Our strategy was as follows (**Figure 4a**). First, an <sup>iK6</sup>DHFR-tagged signaling protein  
3 is recruited to the PM by m<sup>D</sup>cTMP, inducing the first synthetic signal activation. The  
4 protein is then returned to the cytoplasm by treating the cells with excess free TMP (as a  
5 competitor ligand), terminating the first signal pulse. Subsequently, by a washing  
6 procedure, the free TMP is removed from the cells, whereas m<sup>D</sup>cTMP (and its  
7 palmitoylated form) remains in the cells because of its high affinity with the membranes.  
8 Consequently, the <sup>iK6</sup>DHFR-tagged protein is relocalized to the PM. Therefore, by  
9 repeating the TMP addition and washing steps, following the initial m<sup>D</sup>cTMP addition,  
10 we should be able to reversibly and repeatedly induce the PM–cytoplasm shuttling of the  
11 protein with the desired temporal control.

12 To test this strategy, HeLa cells expressing <sup>iK6</sup>DHFR-EGFP were plated on a culture  
13 dish equipped with a culture-medium flow system (**Figure S13a**). First, the cells were  
14 treated with m<sup>D</sup>cTMP (10 μM) to induce the PM translocation of <sup>iK6</sup>DHFR-EGFP (**Figure**  
15 **S13b**). Following this treatment, the cells were incubated with excess TMP (50 μM),  
16 which caused <sup>iK6</sup>DHFR-EGFP to be returned to the cytoplasm. After 20 min, the cells  
17 were washed with fresh medium using the flow system. As expected, we observed the  
18 relocalization of <sup>iK6</sup>DHFR-EGFP to the PM (**Figure S13b**). When we repeated the cycle  
19 of TMP addition and washout, the localization of <sup>iK6</sup>DHFR-EGFP oscillated between the  
20 cytoplasm and the PM (**Figure S13b,c**). This experiment demonstrated the proof of  
21 principle that the combined use of the m<sup>D</sup>cTMP/<sup>iK6</sup>DHFR SLIPT system, free TMP, and  
22 a medium flow system can enable the user-defined oscillatory control and single-cell  
23 imaging of reversible PM–cytoplasm protein translocation.

24 Finally, we investigated the chemical control of ERK signal oscillations using the  
25 system established above. For this purpose, we used HeLa cells coexpressing cRaf-mNG-  
26 <sup>iK6</sup>DHFR and mCherry-tagged ERK (mCh-ERK) (**Figure 4a**). The cells were first treated  
27 with m<sup>D</sup>cTMP, followed by repeated TMP addition and washing cycles. Using this  
28 procedure, ERK activity was reversibly switched on and off synchronously with the  
29 chemically controlled shuttling of cRaf-mNG-<sup>iK6</sup>DHFR between the PM and the  
30 cytoplasm (**Figure 4b,c** and **Movie S8**). Therefore, we successfully demonstrated the  
31 applicability of the present SLIPT system to the chemogenetic control of synthetic ERK  
32 signal oscillations.

33

1

## 2 CONCLUSION

3 In this work, we have developed a universal protein tag for PM-specific SLIPT, <sup>iK6</sup>DHFR,  
4 by inserting a K6 motif into a loop region of eDHFR. The <sup>iK6</sup>DHFR tag can be fused to  
5 either the *N*-terminus or *C*-terminus of proteins, and even between two proteins or protein  
6 domains, without the loss of its PM specificity, offering a high degree of flexibility in the  
7 construction of <sup>iK6</sup>DHFR fusion proteins. The <sup>iK6</sup>DHFR-tagged proteins can be rapidly  
8 recruited to the PM on the order of minutes in the presence of m<sup>D</sup>cTMP. We demonstrated  
9 the applicability of the m<sup>D</sup>cTMP/<sup>iK6</sup>DHFR SLIPT system to control a wide range of  
10 signaling proteins with different sizes (ca. 24 to 73 kDa) and physiological functions,  
11 including cRaf, Gαq, Gαs, RasGEF, PI3K, and Tiam1, verifying the versatility and  
12 general utility of the system. From the viewpoint of protein engineering, the design of  
13 <sup>iK6</sup>DHFR reported in this work is a successful example of creating a chemogenetic protein  
14 tag that interfaces with a specific cellular membrane, i.e., the PM, by loop engineering.

15 In combination with a competitor ligand (free TMP) and a culture-medium flow  
16 chamber, we further demonstrated the application of the m<sup>D</sup>cTMP/<sup>iK6</sup>DHFR SLIPT  
17 system to control cRaf localization and ERK signaling activity in a reversible and  
18 repeatable manner. To the best of our knowledge, this work is the first report of chemically  
19 generated synthetic oscillations in cell signaling. In the ERK signal oscillation system,  
20 the forward (signal ON) and reverse (signal OFF) maximum translocation rates of  
21 synthetic cRaf (cRaf-mNG-<sup>iK6</sup>DHFR) were 7.1 ( $t_{1/2}$ ) and 8.3 min ( $t_{rev1/2}$ ), respectively. We  
22 were able to chemically generate consecutive synthetic ERK activity pulses three times  
23 in 2 h with a periodicity of ca. 40 min. Based on previous work, stochastic ERK activation  
24 induced by noise and cell-to-cell propagation occurs with a frequency of approximately  
25 10–20 pulses per day depending on the cell density, which corresponds to an averaged  
26 periodicity of ca. 1–2 h.<sup>[41]</sup> Therefore, the SLIPT-based synthetic signal oscillation system  
27 will be useful to reproduce the frequency of ERK activity pulses observed in cultured  
28 cells for biological research. It should also be noted that the signal duration time and  
29 frequency of signal activation can further be modulated by the timing of the TMP addition  
30 and washing steps.

31 In conclusion, the bioorthogonal m<sup>D</sup>cTMP/<sup>iK6</sup>DHFR-based SLIPT system, which is  
32 easy to use and enables the rapid, reversible, and repeatable chemical manipulation of  
33 protein localization and signaling processes at the PM, will offer a powerful and versatile

1 chemogenetic platform to interrogate dynamic signaling networks and engineer cell  
2 functions for mammalian synthetic biology applications.

3

4

## 5 **ACKNOWLEDGMENTS**

6 We thank Dr. K. Kuwata (Nagoya University) for HRMS measurement of fluorescein-  
7 conjugated TMP. This work was supported by JSPS Grants-in-Aid for Scientific Research  
8 (KAKENHI) (Grant Nos. JP15H05949 “Resonance Bio”, JP18H02086, and JP18H04546  
9 and JP20H04706 “Chemistry for Multimolecular Crowding Biosystems”), the Uehara  
10 Memorial Foundation, and the Takeda Science Foundation (to S.T.). This work was also  
11 supported by JST PRESTO (JPMJPR178B) and MEXT Leading Initiative for Excellent  
12 Young Researchers (to T.Y.). S.S. acknowledges scholarship support from the Hirota  
13 Scholarship Society and the SUNBOR Scholarship from the Suntory Foundation for Life  
14 Sciences. A.N. is a recipient of the JSPS Research fellowship for Young Scientists  
15 (JP19J01341).

16

## 17 **Conflicts of interest**

18 S.S., A.N., T.Y., and S.T. are co-inventors on a patent application related to this work. The  
19 other authors declare no competing interests.

20

21

## 22 **REFERENCES**

- 23 1. L. Dehmelt, P. I. H. Bastiaens, *Nat. Rev. Mol. Cell Biol.* **2010**, *11*, 440–452.
- 24 2. B. N. Kholodenko, J. F. Hancock, W. Kolch, *Nat. Rev. Mol. Cell Biol.* **2010**, *11*, 414–  
25 426.
- 26 3. M. Maeda, S. Lu, G. Shaulsky, Y. Miyazaki, H. Kuwayama, Y. Tanaka, A. Kuspa,  
27 W. F. Loomis, *Science* **2004**, *304*, 875–878.
- 28 4. H. Shankaran, D. L. Ippolito, W. B. Chrisler, H. Resat, N. Bollinger, L. K. Opresko,  
29 H. S. Wiley, *Mol. Syst. Biol.* **2009**, *5*, 332.
- 30 5. A. Fegan, B. White, J. C. T. Carlson, C. R. Wagner, *Chem. Rev.* **2010**, *110*, 3315–  
31 3336.
- 32 6. A. Rutkowska, C. Schultz, *Angew. Chem. Int. Ed.* **2012**, *51*, 8166–8176.
- 33 7. S. Voß, L. Klewer, Y.-W. Wu, *Curr. Opin. Chem. Biol.* **2015**, *28*, 194–201.

- 1 8. K. Zhang, B. Cui, *Trends Biotechnol.* **2015**, *33*, 92–100.
- 2 9. P. Hannanta-Anan, S. T. Glantz, B. Y. Chow, *Curr. Opin. Struct. Biol.* **2019**, *57*, 84–
- 3 92.
- 4 10. C. M. Welch, H. Elliott, G. Danuser, K. M. Hahn, *Nat. Rev. Mol. Cell Biol.* **2011**,
- 5 *12*, 749–756.
- 6 11. M. Putyrski, C. Schultz, *FEBS Lett.* **2012**, *586*, 2097–2105.
- 7 12. R. DeRose, T. Miyamoto, T. Inoue, *Pflüg. Arch.* **2013**, *465*, 409–417.
- 8 13. T. Komatsu, I. Kukelyansky, J. M. McCaffery, T. Ueno, L. C. Varela, T. Inoue, *Nat.*
- 9 *Methods* **2010**, *7*, 206–208.
- 10 14. Y. Lin, Y. Nihongaki, T. Liu, S. Razavi, M. Sato, T. Inoue, *Angew. Chem. Int. Ed.*
- 11 **2013**, *52*, 6450–6454.
- 12 15. P. Liu, A. Calderon, G. Konstantinidis, J. Hou, S. Voss, X. Chen, F. Li, S. Banerjee,
- 13 J.-E. Hoffmann, C. Theiss, L. Dehmelt, Y.-W. Wu, *Angew. Chem. Int. Ed.* **2014**, *53*,
- 14 10049–10055.
- 15 16. X. Chen, M. Venkatachalapathy, L. Dehmelt, Y.-W. Wu, *Angew. Chem. Int. Ed.*
- 16 **2018**, *57*, 11993–11997.
- 17 17. S. Feng, V. Laketa, F. Stein, A. Rutkowska, A. MacNamara, S. Depner, U.
- 18 Klingmüller, J. Saez-Rodriguez, C. Schultz, *Angew. Chem. Int. Ed.* **2014**, *53*, 6720–
- 19 6723.
- 20 18. E. R. Ballister, C. Aonbangkhen, A. M. Mayo, M. A. Lampson, D. M. Chenoweth,
- 21 *Nat. Commun.* **2014**, *5*, 5475.
- 22 19. X. Chen, Y.-W. Wu, *Angew. Chem. Int. Ed.* **2018**, *57*, 6796–6799.
- 23 20. H. Nakanishi, T. Yoshii, S. Kawasaki, K. Hayashi, K. Tsutsui, C. Oki, S. Tsukiji, H.
- 24 Saito, *Cell Chem. Biol.* **2021**, DOI 10.1016/j.chembiol.2021.01.002.
- 25 21. M. Ishida, H. Watanabe, K. Takigawa, Y. Kurishita, C. Oki, A. Nakamura, I.
- 26 Hamachi, S. Tsukiji, *J. Am. Chem. Soc.* **2013**, *135*, 12684–12689.
- 27 22. A. Nakamura, C. Oki, K. Kato, S. Fujinuma, G. Maryu, K. Kuwata, T. Yoshii, M.
- 28 Matsuda, K. Aoki, S. Tsukiji, *ACS Chem. Biol.* **2020**, *15*, 1004–1015.
- 29 23. A. Nakamura, C. Oki, S. Sawada, T. Yoshii, K. Kuwata, A. K. Rudd, N. K. Devaraj,
- 30 K. Noma, S. Tsukiji, *ACS Chem. Biol.* **2020**, *15*, 837–843.
- 31 24. S. Suzuki, M. Ikuta, T. Yoshii, A. Nakamura, K. Kuwata, S. Tsukiji, *Chem.*
- 32 *Commun.* **2020**, *56*, 7961–7964.
- 33 25. L. W. Miller, Y. Cai, M. P. Sheetz, V. W. Cornish, *Nat. Methods* **2005**, *2*, 255–257.

- 1 26. M. R. Sawaya, J. Kraut, *Biochemistry* **1997**, *36*, 586–603.
- 2 27. T. Yeung, G. E. Gilbert, J. Shi, J. Silvius, A. Kapus, S. Grinstein, *Science* **2008**,
- 3 319, 210–213.
- 4 28. T. Yeung, M. Terebiznik, L. Yu, J. Silvius, W. M. Abidi, M. Philips, T. Levine, A.
- 5 Kapus, S. Grinstein, *Science* **2006**, *313*, 347–351.
- 6 29. G. R. V. Hammond, M. J. Fischer, K. E. Anderson, J. Holdich, A. Koteci, T. Balla,
- 7 R. F. Irvine, *Science* **2012**, *337*, 727–730.
- 8 30. W. D. Heo, T. Inoue, W. S. Park, M. L. Kim, B. O. Park, T. J. Wandless, T. Meyer,
- 9 *Science* **2006**, *314*, 1458–1461.
- 10 31. A. Nakamura, R. Katahira, S. Sawada, E. Shinoda, K. Kuwata, T. Yoshii, S. Tsukiji,
- 11 *Biochemistry* **2019**, *59*, 205–211.
- 12 32. H. Lavoie, M. Therrien, *Nat. Rev. Mol. Cell Bio.* **2015**, *16*, 281–298.
- 13 33. S. Regot, J. J. Hughey, B. T. Bajar, S. Carrasco, M. W. Covert, *Cell* **2014**, *157*,
- 14 1724–1734.
- 15 34. G. Maryu, M. Matsuda, K. Aoki, *Cell Struct. Funct.* **2016**, *41*, 81–92.
- 16 35. N. Wettschureck, S. Offermanns, *Physiol. Rev.* **2005**, *85*, 1159–1204.
- 17 36. D. Hilger, M. Masureel, B. K. Kobilka, *Nat. Struct. Mol. Biol.* **2018**, *25*, 4–12.
- 18 37. M. Putyrski, C. Schultz, *Chem. Biol.* **2011**, *18*, 1126–1133.
- 19 38. G. L. Waldo, T. K. Ricks, S. N. Hicks, M. L. Cheever, T. Kawano, K. Tsuboi, X.
- 20 Wang, C. Montell, T. Kozasa, J. Sondek, T. K. Harden, *Science* **2010**, *330*, 974–980.
- 21 39. M. Grundmann, E. Kostenis, *Trends Pharmacol. Sci.* **2017**, *38*, 1110–1124.
- 22 40. J. Wu, L. Liu, T. Matsuda, Y. Zhao, A. Rebane, M. Drobizhev, Y.-F. Chang, S.
- 23 Araki, Y. Arai, K. March, T. E. Hughes, K. Sagou, T. Miyata, T. Nagai, W. Li, R. E.
- 24 Campbell, *ACS Chem. Neurosci.* **2013**, *4*, 963–972.
- 25 41. K. Aoki, Y. Kumagai, A. Sakurai, N. Komatsu, Y. Fujita, C. Shionyu, M. Matsuda,
- 26 *Mol. Cell* **2013**, *52*, 529–40.
- 27 42. G. Lahav, N. Rosenfeld, A. Sigal, N. Geva-Zatorsky, A. J. Levine, M. B. Elowitz,
- 28 U. Alon, *Nat. Genet.* **2004**, *36*, 147–150.
- 29 43. S. Tay, J. J. Hughey, T. K. Lee, T. Lipniacki, S. R. Quake, M. W. Covert, *Nature*
- 30 **2010**, *466*, 267–271.
- 31 44. J. E. Toettcher, O. D. Weiner, W. A. Lim, *Cell* **2013**, *155*, 1422–1434.
- 32 45. A. A. Gil, C. Carrasco-López, L. Zhu, E. M. Zhao, P. T. Ravindran, M. Z. Wilson,
- 33 A. G. Goglia, J. L. Avalos, J. E. Toettcher, *Nat. Commun.* **2020**, *11*, 4044.

- 1 46. P. Hannanta-anan, B. Y. Chow, *Cell Syst.* **2016**, *2*, 283–288.
- 2 47. T. D. Goddard, C. C. Huang, E. C. Meng, E. F. Pettersen, G. S. Couch, J. H. Morris,
- 3 T. E. Ferrin, *Protein Sci.* **2017**, *27*, 14–25.
- 4

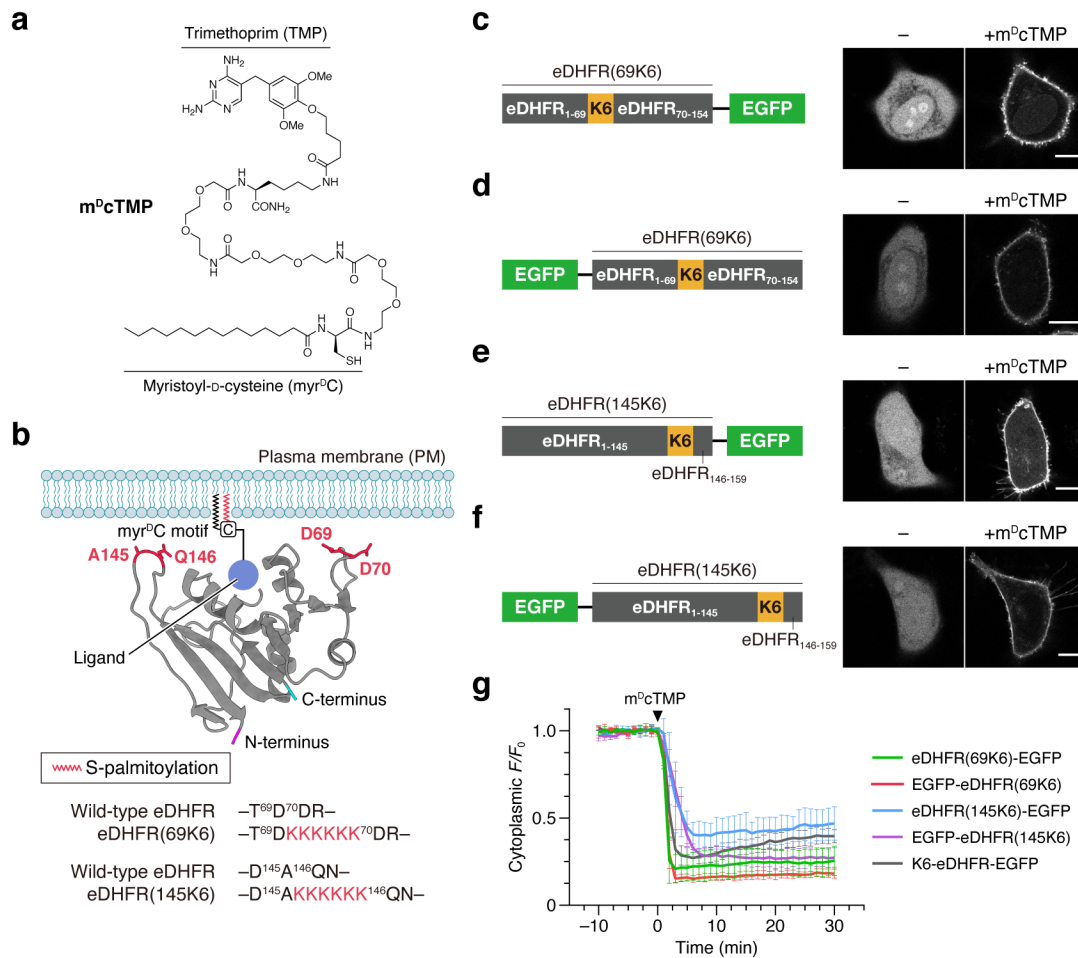

1  
2 **Figure 1.** Development of a universal protein tag for PM-specific SLIPT. (a) Chemical structure  
3 of m<sup>D</sup>cTMP. (b) Design of loop-engineered eDHFR constructs based on the topology of PM-  
4 anchored eDHFR. In the schematic illustration, the crystal structure of eDHFR complexed with  
5 methotrexate (PDB: 1RG7<sup>[26]</sup>) was used and the cartoon model was created with UCSF  
6 ChimeraX<sup>[47]</sup> (methotrexate is not shown). The structure is depicted in a manner such that eDHFR  
7 is anchored on the putative PM by m<sup>D</sup>cTMP. The N- and C-termini are shown in magenta and  
8 cyan, respectively. The K6 motif was inserted between D69 and D70 or between A145 and Q146  
9 of wild-type eDHFR to generate eDHFR<sup>69K6</sup> and eDHFR<sup>145K6</sup>, respectively. (c–f) m<sup>D</sup>cTMP-  
10 induced translocation of eDHFR<sup>69K6</sup>-EGFP (c), EGFP-eDHFR<sup>69K6</sup> (d), eDHFR<sup>145K6</sup>-EGFP (e),  
11 and EGFP-eDHFR<sup>145K6</sup> (f). Confocal fluorescence images of HeLa cells expressing the indicated  
12 construct were taken before (left) and 30 min after the addition of m<sup>D</sup>cTMP (10 μM) (right). Scale  
13 bars, 10 μm. For the time-lapse movie of EGFP-eDHFR<sup>69K6</sup> translocation, see **Movie S1**. (g) Time  
14 course of PM translocation (quantification of data shown in c–f and **Figure S2**). The normalized  
15 fluorescence intensity in the cytoplasm was plotted as a function of time. Data are presented as  
16 the mean ± SD (n = 5 cells).

17  
18



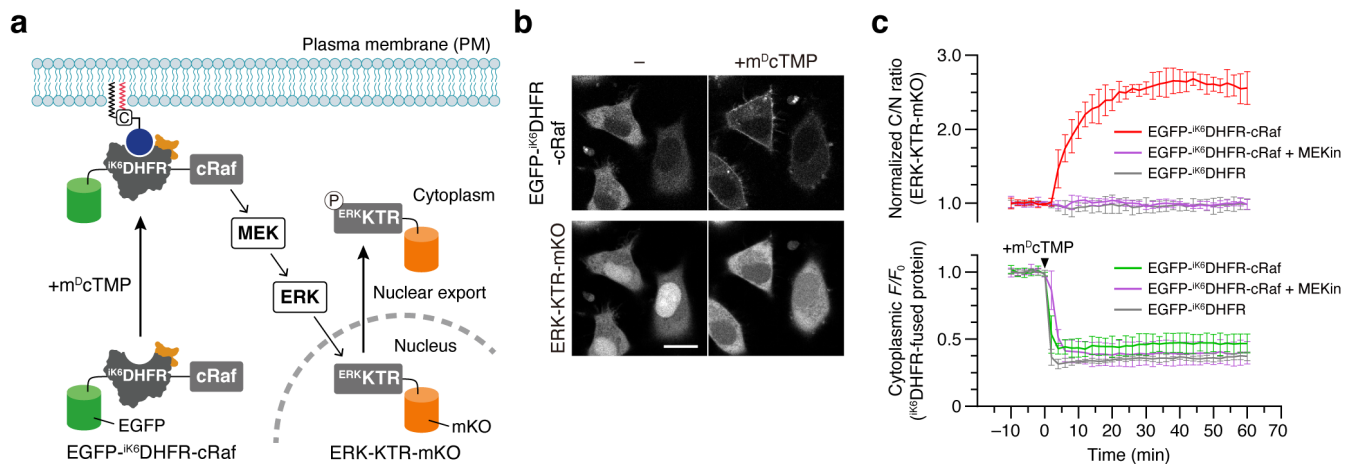

1

2 **Figure 2.** Chemogenetic activation of the Raf/ERK pathway. (a) Schematic illustration of the  
 3 experimental setup. (b) Confocal fluorescence images of HeLa cells coexpressing EGFP-  
 4  $iK^6$ DHFR-cRaf and ERK-KTR-mKO were taken before (left) and 60 min after the addition of  
 5  $m^D$ cTMP (10  $\mu$ M) (right). Scale bar, 20  $\mu$ m. For the time-lapse movie, see **Movie S2**. (c) Time  
 6 course of EGFP- $iK^6$ DHFR-cRaf translocation and ERK activation. To evaluate EGFP- $iK^6$ DHFR-  
 7 cRaf translocation (bottom), the normalized fluorescence intensity of EGFP- $iK^6$ DHFR-  
 8 cRaf in the cytoplasm was plotted as a function of time. To evaluate ERK activity (top), the normalized ratios  
 9 of the cytoplasmic fluorescence intensity to the nuclear fluorescence intensity (C/N ratios) of  
 10 ERK-KTR-mKO were plotted as a function of time. Data from control experiments using EGFP-  
 11  $iK^6$ DHFR-cRaf in the presence of the MEK inhibitor PD184352 (**Figure S7a**) or EGFP- $iK^6$ DHFR  
 12 (lacking the cRaf protein) (**Figure S7b**) were plotted on the same graph. Data are presented as  
 13 the mean  $\pm$  SD (n = 5 cells).

14

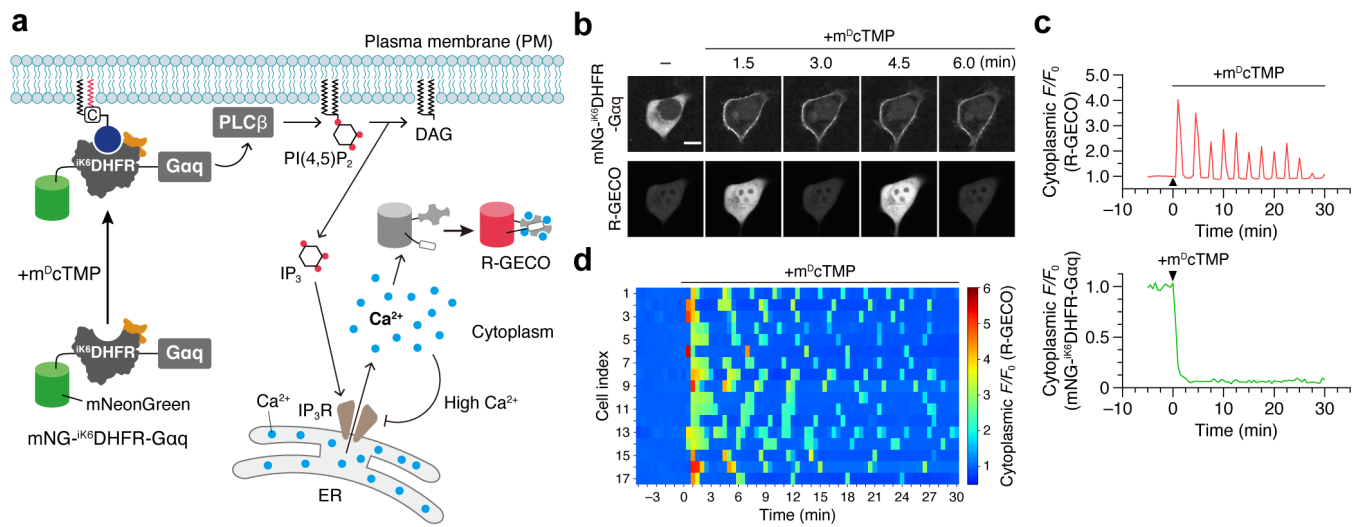

1

2 **Figure 3.** Chemogenetic activation of  $G\alpha q$  signaling and  $Ca^{2+}$  oscillations. (a) Schematic  
3 illustration of the experimental setup. (b) Representative time-lapse confocal fluorescence images  
4 of a HeLa cell coexpressing  $mNG^{iK6}DHFR-G\alpha q$  and R-GECO. Images were taken before and  
5 after the addition of  $m^DcTMP$  (5  $\mu M$ ). Scale bar, 10  $\mu m$ . For the time-lapse movie, see **Movie S3**.  
6 (c) The time course of  $mNG^{iK6}DHFR-G\alpha q$  translocation and  $Ca^{2+}$  spikes observed in the cell is  
7 shown in panel b. The normalized fluorescence intensities of  $mNG^{iK6}DHFR-G\alpha q$  (bottom) and  
8 R-GECO (top) in the cytoplasm were plotted as a function of time. (d) Heatmaps depicting  
9  $m^DcTMP$ -induced  $Ca^{2+}$  oscillations for 17 randomly selected cells coexpressing  $mNG^{iK6}DHFR-$   
10  $G\alpha q$  and R-GECO.

11

12

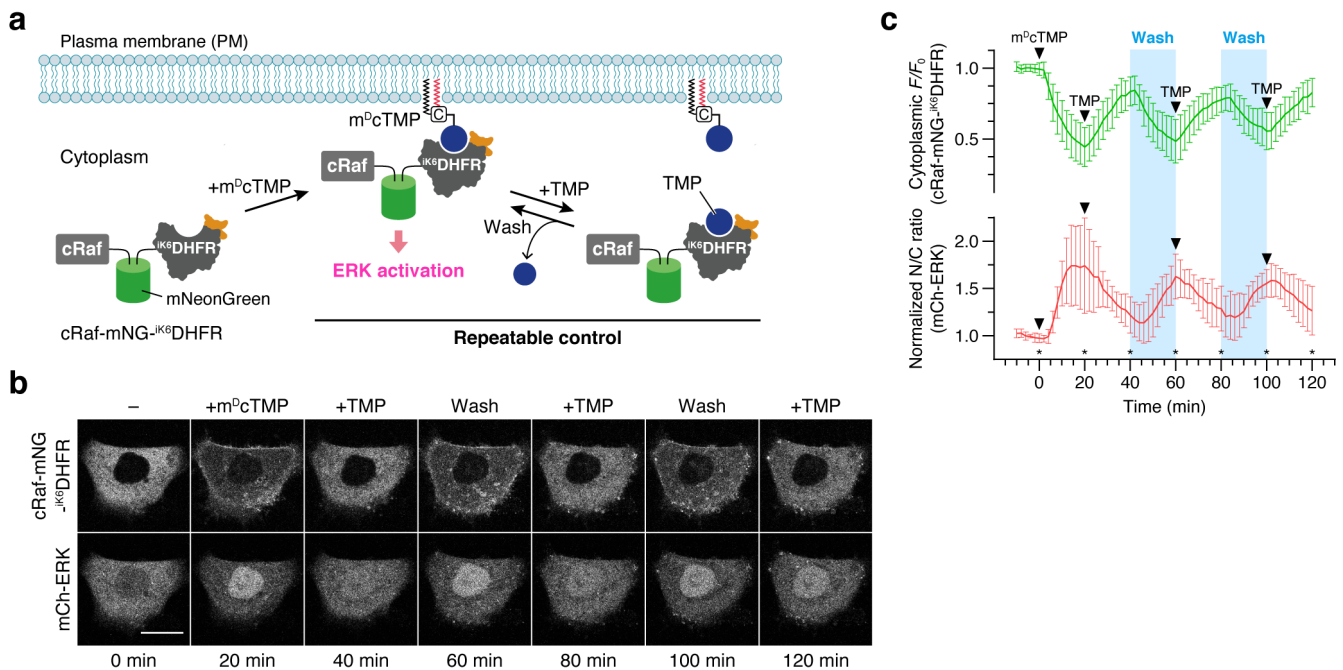

1  
 2 **Figure 4.** Chemical induction of synthetic ERK signal oscillation. (a) Schematic illustration of  
 3 the experimental setup. The washing procedure was carried out using a culture-medium flow  
 4 system as shown in **Figure S13a**. (b) Representative time-lapse confocal fluorescence images of  
 5 a HeLa cell coexpressing cRaf-mNG-<sup>iK6</sup>DHFR and mCh-ERK. Images were taken at the time  
 6 points indicated by the asterisks shown in panel c. m<sup>Dc</sup>TMP and TMP were added at  
 7 concentrations of 10 and 50  $\mu$ M, respectively. During the washing step (the blue bar in panel c),  
 8 fresh medium continuously flowed at a rate of 1 mL/min. Scale bar, 20  $\mu$ m. For the time-lapse  
 9 movie, see **Movie S8**. (c) Time course of cRaf-mNG-<sup>iK6</sup>DHFR translocation and ERK activity. To  
 10 evaluate cRaf-mNG-<sup>iK6</sup>DHFR translocation (top), the normalized fluorescence intensity of cRaf-  
 11 mNG-<sup>iK6</sup>DHFR in the cytoplasm was plotted as a function of time. To evaluate ERK activity  
 12 (bottom), the normalized ratios of the nuclear fluorescence intensity to the cytoplasmic  
 13 fluorescence intensity (N/C ratios) of mCh-ERK were plotted as a function of time. Data are  
 14 presented as the mean  $\pm$  SD (n = 12 cells).  
 15
